# Supplementary material for: Loss of TRPM8 Exacerbate Herpes Simplex Keratitis Infection in Mice by Promoting the Infiltration of CD11b+ Ly6G+ Cells and Increasing the Viral Load in the Cornea
Source: PubMed Central journal article supplement — Invest Ophthalmol Vis Sci. 2023 Dec 20;64(15):24. doi: 10.1167/iovs.64.15.24 (PMC10741096; doi:10.1167/iovs.64.15.24), 2023-12-20
Supplement: iovs-64-15-24_s001.pdf [file iovs-64-15-24_s001.pdf]

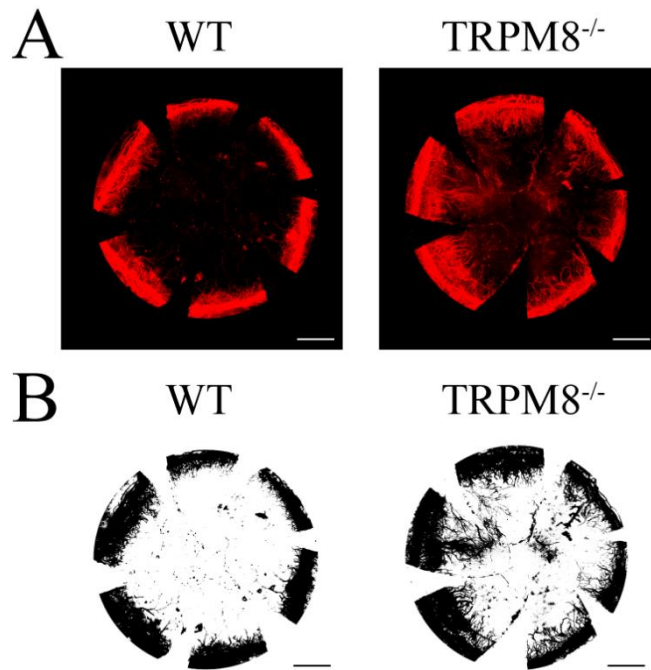

**Figure S1.** The CD31-staining blood vessels in corneal flat mounts staining in WT and TRPM8<sup>-/-</sup> mice 6 dpi. (A) showed the original view, and (B) showed grayscale image for analysis (scale bar = 500  $\mu$ m).

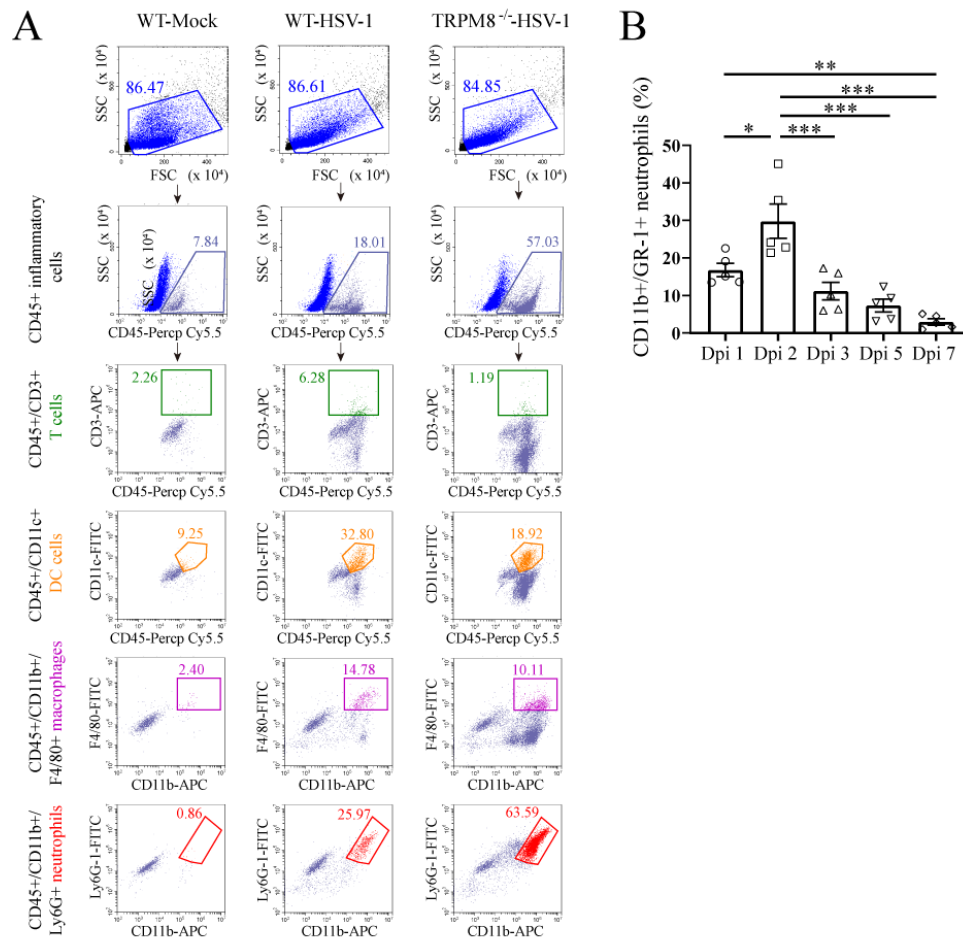

**Figure S2.** The leukocyte infiltration and dynamics of CD11b<sup>+</sup> Ly6G<sup>+</sup> cells infiltration during HSV-1 infection. **(A)** TRPM8<sup>-/-</sup> mice and WT mice were infected with culture medium (mock infection) or HSV-1 by corneal scarification. Immune responses in the cornea were analyzed 3 dpi by flow cytometry. FSC and SSC gating was used to exclude cell debris. Compared with WT mice, TRPM8<sup>-/-</sup> mice, if infected with HSV-1, had massive increased numbers of infiltrating CD45<sup>+</sup> CD11b<sup>+</sup> Ly6G<sup>+</sup> cells rather than CD45<sup>+</sup> CD11b<sup>+</sup> F4/80<sup>+</sup> macrophages, CD45<sup>+</sup> CD3<sup>+</sup> T cells and CD45<sup>+</sup> CD11c<sup>+</sup> DC cells. **(B)** Dynamics of CD11b<sup>+</sup> Ly6G<sup>+</sup> cells infiltration in WT mice. CD11b<sup>+</sup> Ly6G<sup>+</sup> cells migration into the cornea of WT mice began on 1 dpi, peaked at

2 dpi, and subsided slowly thereafter until 7 dpi ( $n = 5$  per group).  $*p < 0.05$ ,  $**p < 0.01$ ,  $***p < 0.001$ .

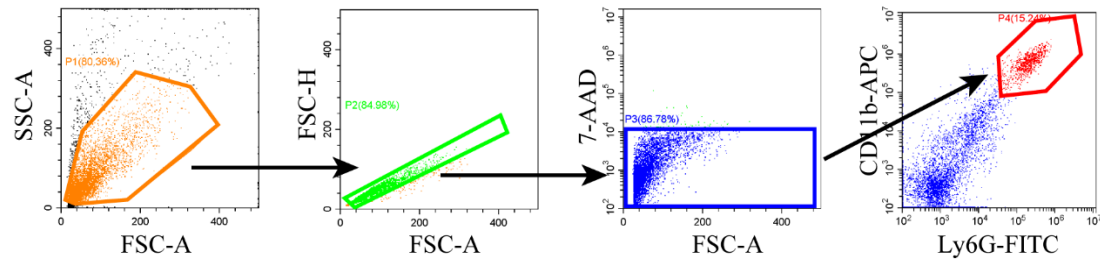

**Figure S3.** The new gating strategy used in flow cytometric analysis.

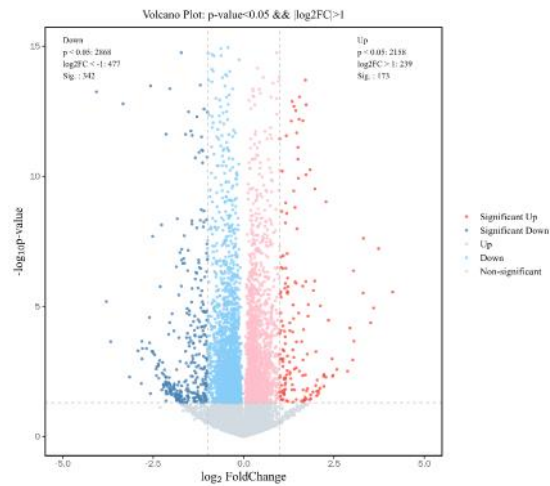

**Figure S4.** Volcano plot exhibiting differential expressed genes between WT mice and TRPM8<sup>-/-</sup> mice.

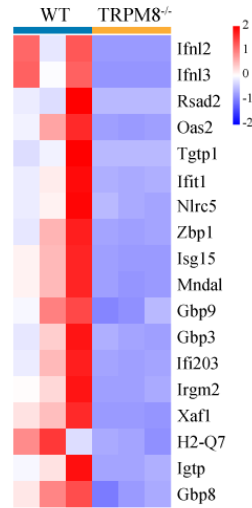

**Figure S5.** Heatmap showing the ISGs that were down-regulated in TRPM8<sup>-/-</sup> corneas compared with levels in WT corneas with no treatment.

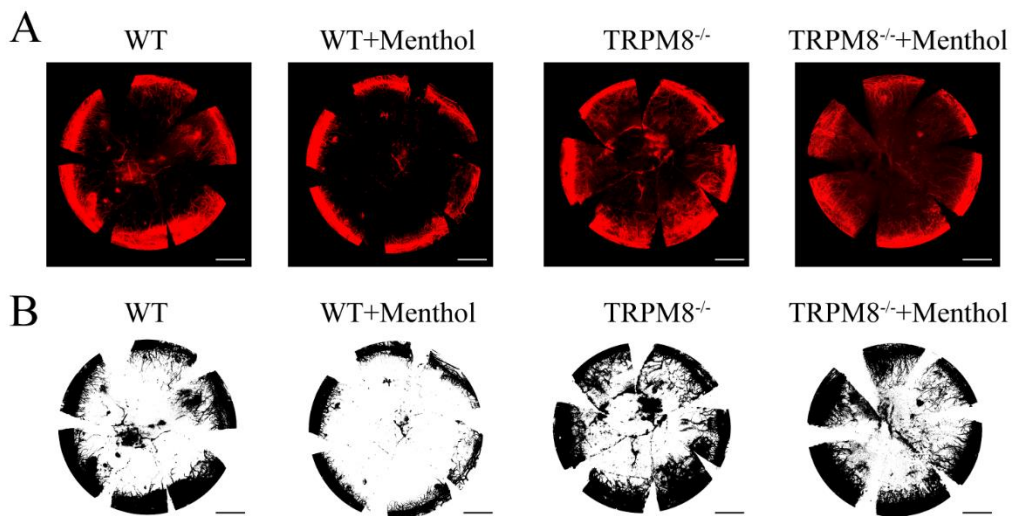

**Figure S6.** The CD31-staining blood vessels in corneal flat mounts staining in WT and TRPM8<sup>-/-</sup> mice with menthol or menthol control treatment 6 dpi. (A) showed the original view, and (B) showed grayscale image for analysis (scale bar = 500  $\mu$ m).
